# Supplementary material for: Glacial CO 2 decrease and deep-water deoxygenation by iron fertilization from glaciogenic dust
Source: Copernicus journal article supplement (doi:10.5194/cp-2019-31), 2019-03-07
Supplement: Supplementary file 1 [file cp-2019-31-supplement.pdf]

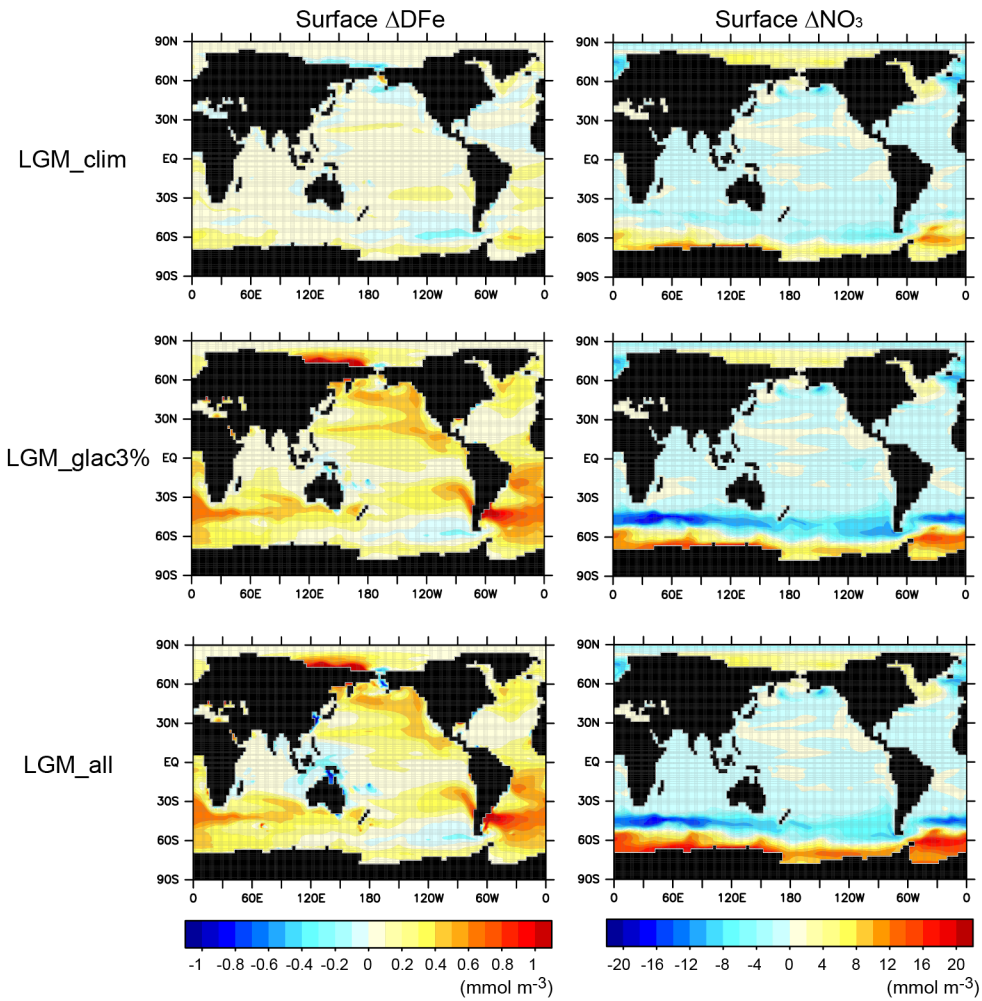

1

2 **Figure S1.** Surface changes of DFe (left) and  $\text{NO}_3$  (right) from PI to LGM\_clim (top), LGM\_glac3% (middle), and LGM\_all

3 (bottom).

4

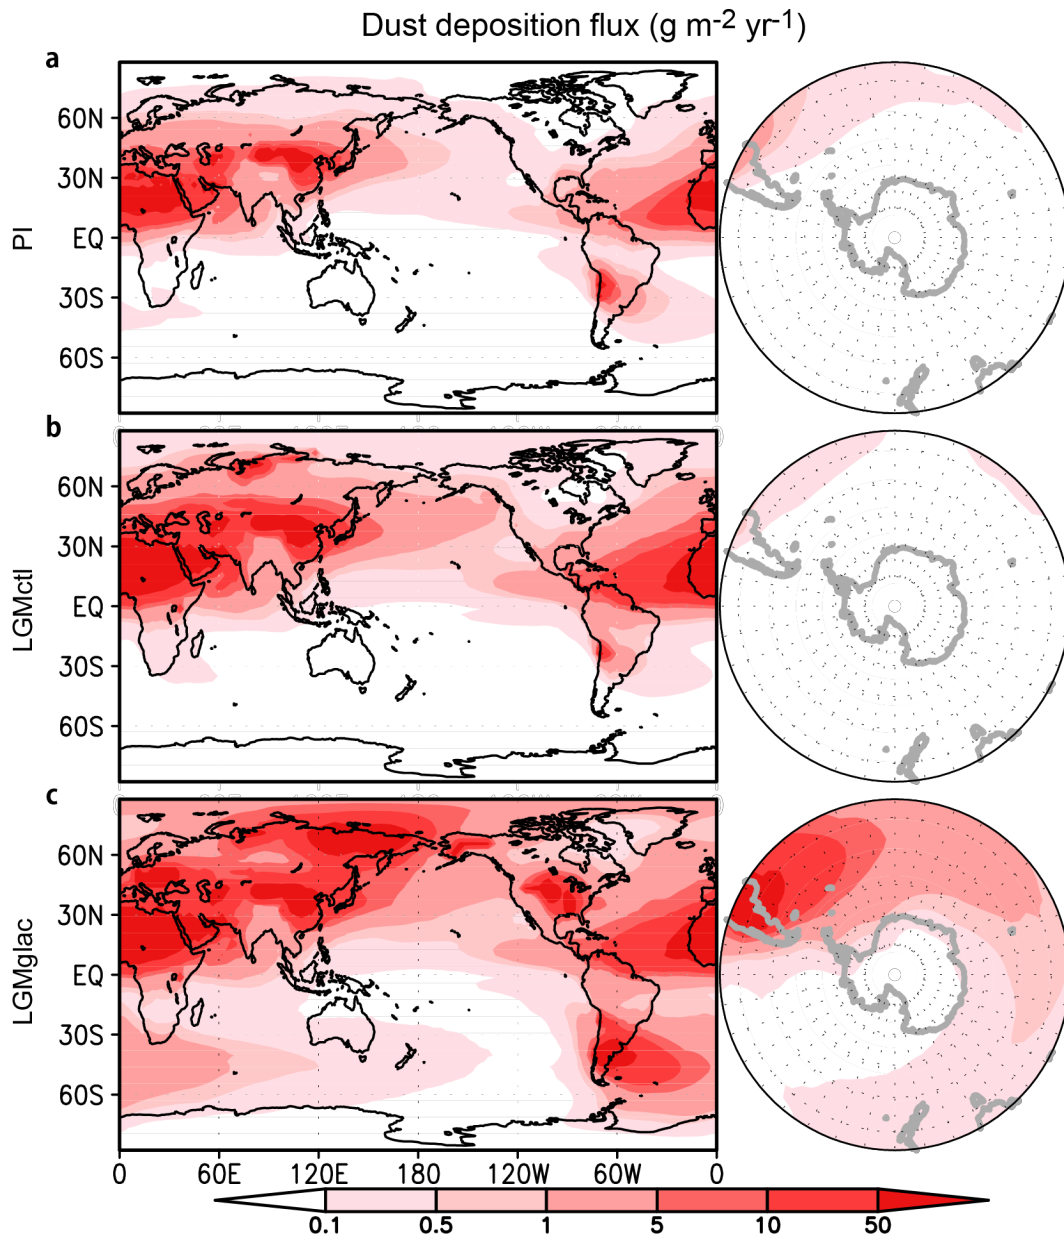

5

6 **Figure S2.** Dust deposition flux ( $\text{g m}^{-2} \text{yr}^{-1}$ ) for (a) PI, (b) LGMctl, and (c) LGMglac. The left and right panel show the  
 7 global and the high latitudes in the Southern Hemisphere, respectively.

8 1.
